# Supplementary material for: QTL mapping of selenium content using a RIL population in wheat
Source: PubMed Central journal article supplement (PMC5589217; doi:10.1371/journal.pone.0184351), 2017-09-07
Supplement: pone.0184351.s001.pdf [file pone.0184351.s001.pdf]

**S1 Table. Se concentration of wheat in hydroponic and field**

| No. | Hydroponic                    |               |               |                               |               |               | Field                          |               |               |
|-----|-------------------------------|---------------|---------------|-------------------------------|---------------|---------------|--------------------------------|---------------|---------------|
|     | Root Se concentration (mg/kg) |               |               | Shoot Se concentration(mg/kg) |               |               | Grain Se concentration (mg/kg) |               |               |
|     | QRsece-<br>E1                 | QRsece-<br>E2 | QRsece-<br>AV | QSsece-<br>E1                 | QSsece-<br>E2 | QSsece-<br>AV | QGsece-<br>E1                  | QGsece-<br>E2 | QGsece-<br>AV |
| 1   | 8.93                          | 7.21          | 8.07          | 0.86                          | 1.06          | 0.96          | 0.12                           | 0.65          | 0.38          |
| 2   | 10.91                         | 10.19         | 10.55         | 1.31                          | 1.56          | 1.44          | 0.16                           | 0.73          | 0.45          |
| 3   | 11.51                         | 10.98         | 11.24         | 1.01                          | 1.36          | 1.19          | 0.25                           | 1.61          | 0.93          |
| 4   | 11.11                         | 12.01         | 11.56         | 1.04                          | 1.14          | 1.09          | 0.12                           | 0.61          | 0.36          |
| 5   | 10.99                         | 11.43         | 11.21         | 1.90                          | 2.42          | 2.16          | 0.16                           | 1.46          | 0.81          |
| 6   | 11.11                         | 10.00         | 10.56         | 1.01                          | 1.34          | 1.18          | 0.23                           | 0.48          | 0.35          |
| 7   | 10.81                         | 11.35         | 11.08         | 1.08                          | 1.51          | 1.30          | 0.19                           | 0.51          | 0.35          |
| 8   | 11.11                         | 11.80         | 11.45         | 1.21                          | 1.32          | 1.26          | 0.20                           | 0.67          | 0.44          |
| 9   | 10.80                         | 10.00         | 10.40         | 1.44                          | 1.11          | 1.28          | 0.29                           | 0.66          | 0.47          |
| 10  | 11.14                         | 11.00         | 11.07         | 1.27                          | 1.08          | 1.17          | 0.15                           | 0.39          | 0.27          |
| 11  | 10.06                         | 10.23         | 10.15         | 1.28                          | 1.83          | 1.56          | 0.18                           | 0.85          | 0.51          |
| 12  | 11.92                         | 12.19         | 12.05         | 1.16                          | 1.48          | 1.32          | 0.21                           | 0.70          | 0.46          |
| 13  | 12.37                         | 13.64         | 13.00         | 1.15                          | 1.41          | 1.28          | 0.21                           | 0.73          | 0.47          |
| 14  | 10.49                         | 11.43         | 10.96         | 0.86                          | 1.07          | 0.97          | 0.37                           | 0.61          | 0.49          |
| 15  | 11.67                         | 11.94         | 11.80         | 0.53                          | 0.73          | 0.63          | 0.76                           | 0.53          | 0.65          |
| 16  | 10.51                         | 10.17         | 10.34         | 0.83                          | 0.93          | 0.88          | 0.47                           | 0.29          | 0.38          |
| 17  | 10.53                         | 10.08         | 10.31         | 0.55                          | 0.52          | 0.53          | 0.67                           | 0.92          | 0.80          |
| 18  | 10.05                         | 9.93          | 9.99          | 0.69                          | 0.56          | 0.62          | 0.36                           | 0.68          | 0.52          |
| 19  | 11.40                         | 10.60         | 11.00         | 0.64                          | 0.55          | 0.59          | 1.18                           | 0.92          | 1.05          |
| 20  | 8.71                          | 9.06          | 8.89          | 0.78                          | 0.82          | 0.80          | 0.91                           | 0.82          | 0.87          |
| 21  | 9.23                          | 10.88         | 10.06         | 0.67                          | 0.82          | 0.74          | 0.56                           | 0.90          | 0.73          |
| 22  | 9.00                          | 8.68          | 8.84          | 0.82                          | 0.93          | 0.87          | 0.37                           | 0.05          | 0.21          |
| 23  | 10.93                         | 11.51         | 11.22         | 0.90                          | 0.93          | 0.92          | 0.52                           | 0.21          | 0.37          |
| 24  | 12.49                         | 10.35         | 11.42         | 0.51                          | 0.55          | 0.53          | 0.60                           | 0.39          | 0.49          |
| 25  | 10.20                         | 10.03         | 10.11         | 0.62                          | 0.63          | 0.62          | 2.23                           | 0.18          | 1.21          |
| 26  | 9.48                          | 9.48          | 9.48          | 0.51                          | 0.55          | 0.53          | 1.62                           | 0.08          | 0.85          |
| 27  | 10.08                         | 9.51          | 9.79          | 0.49                          | 0.54          | 0.52          | 0.40                           | 0.52          | 0.46          |
| 28  | 9.22                          | 9.47          | 9.34          | 0.64                          | 0.78          | 0.71          | 0.51                           | 0.64          | 0.57          |
| 29  | 10.02                         | 9.97          | 10.00         | 0.61                          | 0.67          | 0.64          | 0.83                           | 0.76          | 0.80          |
| 30  | 4.36                          | 4.95          | 4.65          | 0.71                          | 0.77          | 0.74          | 2.04                           | 0.19          | 1.11          |
| 31  | 7.48                          | 6.06          | 6.77          | 0.63                          | 0.77          | 0.70          | 0.50                           | 0.51          | 0.51          |
| 32  | 5.96                          | 4.84          | 5.40          | 0.36                          | 0.36          | 0.36          | 0.42                           | 0.83          | 0.63          |
| 33  | 7.15                          | 7.86          | 7.51          | 0.66                          | 0.69          | 0.68          | 0.40                           | 0.73          | 0.57          |
| 34  | 8.73                          | 8.93          | 8.83          | 0.84                          | 0.87          | 0.85          | 2.41                           | 2.04          | 2.22          |

---

|    |       |       |       |      |      |      |      |      |      |
|----|-------|-------|-------|------|------|------|------|------|------|
| 35 | 9.17  | 9.34  | 9.25  | 0.67 | 0.75 | 0.71 | 1.24 | 0.81 | 1.02 |
| 36 | 8.96  | 8.06  | 8.51  | 0.45 | 0.39 | 0.42 | 1.84 | 0.52 | 1.18 |
| 37 | 7.59  | 7.13  | 7.36  | 0.69 | 0.66 | 0.68 | 0.50 | 1.55 | 1.03 |
| 38 | 10.07 | 9.68  | 9.88  | 0.61 | 0.56 | 0.59 | 0.41 | 0.64 | 0.53 |
| 39 | 9.84  | 8.73  | 9.29  | 0.02 | .    | .    | 0.59 | 0.01 | 0.30 |
| 40 | 7.98  | 8.03  | 8.01  | 1.08 | 0.89 | 0.98 | 0.52 | 0.40 | 0.46 |
| 41 | 7.98  | 8.42  | 8.20  | 0.59 | 0.57 | 0.58 | 0.64 | 0.18 | 0.41 |
| 42 | 9.70  | 9.09  | 9.39  | 0.40 | 0.44 | 0.42 | 0.55 | 0.41 | 0.48 |
| 43 | 10.88 | 9.72  | 10.30 | 0.25 | 0.34 | 0.30 | 0.37 | 0.24 | 0.30 |
| 44 | .     | 11.81 | .     | 0.32 | 0.35 | 0.34 | 0.52 | 0.40 | 0.46 |
| 45 | 8.03  | 8.15  | 8.09  | 0.57 | 0.65 | 0.61 | 0.43 | .    | .    |
| 46 | 9.33  | 9.09  | 9.21  | 0.61 | 0.66 | 0.64 | 0.54 | 0.43 | 0.49 |
| 47 | 10.62 | 11.10 | 10.86 | 0.53 | 0.65 | 0.59 | 0.65 | 0.53 | 0.59 |
| 48 | 9.50  | 9.56  | 9.53  | 0.65 | 0.74 | 0.69 | 0.60 | 0.60 | 0.60 |
| 49 | 8.42  | 8.26  | 8.34  | 0.54 | 0.55 | 0.54 | 0.68 | 0.29 | 0.49 |
| 50 | 8.61  | 9.03  | 8.82  | 0.43 | 0.56 | 0.50 | 0.51 | 0.60 | 0.55 |
| 51 | 7.03  | 7.00  | 7.01  | 0.79 | 0.86 | 0.82 | 0.52 | 0.06 | 0.29 |
| 52 | 10.52 | 9.86  | 10.19 | 0.42 | 0.49 | 0.45 | 1.55 | 1.16 | 1.36 |
| 53 | 9.27  | 8.85  | 9.06  | 0.33 | 0.43 | 0.38 | 2.65 | 1.90 | 2.28 |
| 54 | 9.78  | .     | .     | 0.62 | 0.81 | 0.71 | 0.64 | 0.60 | 0.62 |
| 55 | 9.55  | 9.09  | 9.32  | 0.63 | 0.74 | 0.69 | 1.21 | 0.93 | 1.07 |
| 56 | 10.91 | .     | .     | 0.30 | .    | .    | 1.56 | 0.92 | 1.24 |
| 57 | 8.31  | 8.55  | 8.43  | 0.84 | .    | .    | 0.47 | 0.47 | 0.47 |
| 58 | 9.81  | 9.94  | 9.88  | 0.50 | 0.42 | 0.46 | 0.58 | 0.57 | 0.58 |
| 59 | 9.56  | 9.01  | 9.28  | 0.73 | 0.67 | 0.70 | 0.53 | 0.46 | 0.50 |
| 60 | 9.18  | 8.59  | 8.89  | 0.99 | 0.92 | 0.96 | 2.31 | 0.53 | 1.42 |
| 61 | 12.08 | 10.48 | 11.28 | 0.20 | 0.13 | 0.17 | 1.96 | 0.78 | 1.37 |
| 62 | 7.53  | 7.73  | 7.63  | 0.24 | 0.20 | 0.22 | 3.24 | 1.01 | 2.13 |
| 63 | 7.47  | 7.81  | 7.64  | 0.60 | 0.54 | 0.57 | 1.31 | 0.16 | 0.73 |
| 64 | 11.68 | 11.79 | 11.74 | 0.37 | 0.31 | 0.34 | 0.37 | 0.10 | 0.24 |
| 65 | 8.88  | 8.92  | 8.90  | 0.45 | 0.41 | 0.43 | 0.65 | 0.36 | 0.51 |
| 66 | 7.12  | 8.65  | 7.88  | 0.46 | 0.37 | 0.41 | 0.45 | 0.24 | 0.34 |
| 67 | 10.01 | 9.58  | 9.80  | 0.44 | 0.39 | 0.42 | 0.51 | 0.54 | 0.52 |
| 68 | 11.21 | 10.89 | 11.05 | 0.51 | 0.43 | 0.47 | 2.72 | 1.35 | 2.04 |
| 69 | 8.95  | 8.19  | 8.57  | 0.96 | 0.87 | 0.91 | 0.69 | 0.33 | 0.51 |
| 70 | 10.25 | 10.18 | 10.21 | 0.54 | 0.66 | 0.60 | 0.97 | 0.67 | 0.82 |
| 71 | 9.97  | 9.17  | 9.57  | 0.50 | 0.54 | 0.52 | 0.60 | 0.31 | 0.45 |
| 72 | 9.46  | 9.06  | 9.26  | 0.24 | 0.34 | 0.29 | 0.46 | 0.32 | 0.39 |
| 73 | 8.01  | 8.66  | 8.34  | 0.28 | 0.36 | 0.32 | 0.59 | 0.31 | 0.45 |
| 74 | 8.44  | 8.79  | 8.61  | 0.87 | 0.95 | 0.91 | 0.31 | 0.20 | 0.25 |

---

---

|     |       |       |       |      |      |      |      |      |      |
|-----|-------|-------|-------|------|------|------|------|------|------|
| 75  | 11.29 | 11.70 | 11.50 | 0.68 | 0.62 | 0.65 | 0.32 | 1.12 | 0.72 |
| 76  | 9.25  | 8.66  | 8.96  | 0.70 | 0.79 | 0.75 | 0.38 | 1.20 | 0.79 |
| 77  | 10.12 | 11.13 | 10.63 | 0.66 | 0.76 | 0.71 | 0.28 | 0.20 | 0.24 |
| 78  | 9.46  | 7.90  | 8.68  | 0.57 | 0.54 | 0.56 | 0.20 | 0.12 | 0.16 |
| 79  | 11.32 | 11.09 | 11.21 | 0.21 | 0.27 | 0.24 | 0.48 | 0.69 | 0.58 |
| 80  | 9.84  | 9.73  | 9.78  | 0.40 | 0.46 | 0.43 | 0.59 | 0.43 | 0.51 |
| 81  | 5.96  | 5.91  | 5.93  | 0.32 | 0.40 | 0.36 | 0.17 | .    | .    |
| 82  | 5.39  | 5.18  | 5.29  | 0.47 | 0.53 | 0.50 | 0.18 | 0.23 | 0.20 |
| 83  | 8.97  | 8.65  | 8.81  | 0.47 | 0.55 | 0.51 | 0.20 | 0.26 | 0.23 |
| 84  | 6.70  | 6.52  | 6.61  | 0.75 | 0.79 | 0.77 | 0.38 | 0.06 | 0.22 |
| 85  | 6.49  | 6.80  | 6.65  | 0.64 | 0.77 | 0.71 | 0.59 | 0.14 | 0.37 |
| 86  | 8.17  | 7.78  | 7.97  | 0.73 | 0.79 | 0.76 | 0.21 | 0.24 | 0.22 |
| 87  | 9.39  | 9.07  | 9.23  | 0.59 | 0.65 | 0.62 | 0.26 | 0.24 | 0.25 |
| 88  | 4.37  | 4.09  | 4.23  | 0.50 | 0.55 | 0.52 | 0.37 | 0.79 | 0.58 |
| 89  | 6.48  | 5.61  | 6.05  | 0.56 | 0.59 | 0.57 | 0.08 | 0.07 | 0.07 |
| 90  | 6.72  | 6.48  | 6.60  | 0.71 | 0.78 | 0.75 | 0.23 | 0.62 | 0.43 |
| 91  | 9.77  | 9.73  | 9.75  | 0.58 | 0.66 | 0.62 | 0.08 | 0.75 | 0.42 |
| 92  | 7.29  | 7.13  | 7.21  | 0.47 | 0.63 | 0.55 | 0.26 | 0.31 | 0.28 |
| 93  | 8.63  | 8.49  | 8.56  | 0.59 | 0.68 | 0.64 | 0.17 | 0.27 | 0.22 |
| 94  | 8.20  | 8.00  | 8.10  | 0.56 | 0.65 | 0.61 | 0.34 | 0.45 | 0.40 |
| 95  | 8.68  | 9.09  | 8.89  | 0.60 | 0.66 | 0.63 | 0.17 | 0.66 | 0.42 |
| 96  | 8.45  | 8.80  | 8.62  | 1.26 | 1.45 | 1.35 | 0.16 | 0.28 | 0.22 |
| 97  | 8.64  | 7.69  | 8.16  | 0.70 | 0.77 | 0.74 | 0.08 | 0.33 | 0.21 |
| 98  | 10.77 | 10.08 | 10.42 | 0.96 | 1.03 | 0.99 | 0.18 | 0.18 | 0.18 |
| 99  | 7.17  | 7.13  | 7.15  | 0.94 | 1.05 | 1.00 | 0.11 | 0.15 | 0.13 |
| 100 | 7.67  | 7.21  | 7.44  | 0.50 | 0.59 | 0.55 | 0.10 | 0.18 | 0.14 |
| 101 | 6.46  | 6.63  | 6.54  | 0.75 | 0.83 | 0.79 | 0.50 | 0.69 | 0.59 |
| 102 | 6.55  | 6.62  | 6.58  | 0.70 | 0.80 | 0.75 | 0.41 | 0.17 | 0.29 |
| 103 | 9.61  | 9.42  | 9.52  | 0.60 | 0.68 | 0.64 | 0.26 | 0.20 | 0.23 |
| 104 | 10.08 | 10.71 | 10.39 | 0.69 | 0.77 | 0.73 | 0.47 | 0.42 | 0.44 |
| 105 | 10.05 | 10.73 | 10.39 | 0.59 | 0.68 | 0.63 | 0.32 | 0.28 | 0.30 |
| 106 | 10.31 | 10.91 | 10.61 | 0.63 | 0.71 | 0.67 | 0.34 | 0.50 | 0.42 |
| 107 | 8.10  | 7.39  | 7.75  | 0.60 | 0.67 | 0.64 | 0.20 | 0.68 | 0.44 |
| 108 | 4.78  | 4.30  | 4.54  | 0.44 | 0.51 | 0.47 | 0.18 | 0.89 | 0.54 |
| 109 | 9.60  | 9.91  | 9.76  | 0.31 | 0.38 | 0.35 | 0.12 | 0.31 | 0.21 |
| 110 | 8.24  | 8.13  | 8.18  | 0.48 | 0.54 | 0.51 | 0.19 | 0.50 | 0.35 |
| 111 | 6.64  | 6.69  | 6.66  | 0.36 | 0.45 | 0.41 | 0.38 | 1.11 | 0.74 |
| 112 | 9.86  | 9.04  | 9.45  | 0.97 | 1.05 | 1.01 | 0.42 | 0.12 | 0.27 |
| 113 | 8.88  | 8.90  | 8.89  | 0.58 | 0.66 | 0.62 | 0.37 | 0.25 | 0.31 |
| 114 | 11.50 | 10.99 | 11.24 | 0.76 | 0.82 | 0.79 | 0.21 | 0.51 | 0.36 |

---

---

|     |       |       |       |      |      |      |      |      |      |
|-----|-------|-------|-------|------|------|------|------|------|------|
| 115 | 9.10  | 8.61  | 8.85  | 0.70 | 0.72 | 0.71 | 0.40 | 0.48 | 0.44 |
| 116 | 10.62 | 10.11 | 10.36 | 0.72 | 0.79 | 0.76 | 0.17 | 0.41 | 0.29 |
| 117 | 7.49  | 7.84  | 7.66  | 0.95 | 1.11 | 1.03 | 0.33 | 0.54 | 0.44 |
| 118 | 6.81  | 6.42  | 6.61  | 0.71 | 0.75 | 0.73 | 0.37 | 0.48 | 0.43 |
| 119 | 11.14 | 11.12 | 11.13 | 0.34 | 0.39 | 0.37 | 0.31 | 0.20 | 0.25 |
| 120 | 9.00  | 8.98  | 8.99  | 0.28 | 0.34 | 0.31 | 0.45 | 0.22 | 0.33 |
| 121 | 8.17  | 8.18  | 8.17  | 0.95 | 0.99 | 0.97 | 0.16 | 0.28 | 0.22 |
| 122 | 6.66  | 6.54  | 6.60  | 0.61 | 0.67 | 0.64 | 0.22 | 0.24 | 0.23 |
| 123 | 10.17 | 10.18 | 10.18 | 0.93 | 1.16 | 1.04 | 0.23 | 0.76 | 0.49 |
| 124 | 10.64 | 9.58  | 10.11 | 0.43 | 0.55 | 0.49 | 0.37 | 0.74 | 0.55 |
| 125 | 9.79  | 8.99  | 9.39  | 0.72 | 0.67 | 0.69 | 0.31 | 0.30 | 0.31 |
| 126 | 8.51  | 8.11  | 8.31  | 0.65 | 0.59 | 0.62 | 0.20 | 0.32 | 0.26 |
| 127 | 9.22  | 9.66  | 9.44  | 0.45 | 0.51 | 0.48 | 0.40 | 0.43 | 0.42 |
| 128 | 10.26 | 10.61 | 10.43 | 0.58 | 0.59 | 0.59 | 0.18 | 0.71 | 0.44 |
| 129 | 7.01  | 7.52  | 7.26  | 0.26 | 0.32 | 0.29 | 0.26 | 0.32 | 0.29 |
| 130 | 10.05 | 10.69 | 10.37 | 0.43 | 0.50 | 0.46 | 0.37 | 0.54 | 0.45 |
| 131 | 7.85  | 7.96  | 7.90  | 0.57 | 0.63 | 0.60 | 0.32 | 0.25 | 0.28 |
| 132 | 12.34 | 12.30 | 12.32 | 0.51 | 0.47 | 0.49 | 0.79 | 0.35 | 0.57 |
| 133 | 11.14 | 10.77 | 10.95 | 0.45 | 0.43 | 0.44 | 0.12 | 0.10 | 0.11 |
| 134 | 11.21 | 11.63 | 11.42 | 0.69 | 0.68 | 0.68 | 2.95 | 2.14 | 2.54 |
| 135 | 9.45  | 8.97  | 9.21  | 0.64 | 0.61 | 0.63 | 1.60 | 0.95 | 1.27 |
| 136 | 11.09 | 11.19 | 11.14 | 0.57 | 0.56 | 0.56 | 0.84 | 0.69 | 0.76 |
| 137 | 11.39 | 11.18 | 11.28 | 0.95 | 0.93 | 0.94 | 0.81 | 0.78 | 0.79 |
| 138 | 8.88  | 9.09  | 8.98  | 0.87 | 0.82 | 0.85 | 0.78 | 0.40 | 0.59 |
| 139 | 13.02 | 13.20 | 13.11 | 0.46 | 0.42 | 0.44 | 0.54 | 0.52 | 0.53 |
| 140 | 12.24 | 12.10 | 12.17 | 0.58 | 0.54 | 0.56 | 0.45 | 0.43 | 0.44 |
| 141 | 10.56 | 8.98  | 9.77  | 0.52 | 0.49 | 0.51 | 0.64 | 0.45 | 0.55 |
| 142 | 13.29 | 13.27 | 13.28 | 0.64 | 0.65 | 0.65 | 0.21 | 0.63 | 0.42 |
| 143 | 12.92 | 13.60 | 13.26 | 0.65 | 0.67 | 0.66 | 0.75 | 0.68 | 0.72 |
| 144 | 13.05 | 12.70 | 12.88 | 0.54 | 0.46 | 0.50 | 0.17 | 0.01 | 0.09 |
| 145 | 13.62 | 14.12 | 13.87 | 0.87 | 0.79 | 0.83 | 1.08 | 0.71 | 0.90 |
| 146 | 11.40 | 12.51 | 11.95 | 0.79 | 0.80 | 0.80 | 0.89 | 0.40 | 0.65 |
| 147 | 15.03 | 14.61 | 14.82 | 0.72 | 0.72 | 0.72 | 1.19 | 1.05 | 1.12 |
| 148 | 11.42 | 10.77 | 11.10 | 0.72 | 0.89 | 0.81 | 0.89 | 0.11 | 0.50 |
| 149 | 13.62 | 13.99 | 13.81 | 0.71 | 0.80 | 0.76 | 1.18 | 0.89 | 1.04 |
| 150 | 11.70 | 11.08 | 11.39 | 0.70 | 0.79 | 0.74 | 1.13 | 0.91 | 1.02 |
| 151 | 13.71 | 12.71 | 13.21 | 0.62 | 0.69 | 0.66 | 1.32 | 1.00 | 1.16 |
| 152 | .     | 13.78 | .     | 0.72 | 0.80 | 0.76 | 1.24 | 0.82 | 1.03 |
| 153 | 13.60 | 12.65 | 13.12 | 0.71 | 0.79 | 0.75 | 1.09 | 0.97 | 1.03 |
| 154 | 13.80 | 12.00 | 12.90 | 0.68 | 0.78 | 0.73 | 2.22 | 1.75 | 1.98 |

---

|         |       |       |       |      |      |      |      |      |      |
|---------|-------|-------|-------|------|------|------|------|------|------|
| 155     | 13.66 | 13.03 | 13.34 | 0.87 | 0.96 | 0.91 | 1.33 | 1.02 | 1.17 |
| 156     | 14.60 | 14.59 | 14.60 | 0.87 | 0.92 | 0.90 | 1.51 | 0.72 | 1.12 |
| 157     | 13.89 | 12.31 | 13.10 | 0.46 | 0.53 | 0.49 | 1.27 | 1.68 | 1.48 |
| 158     | 12.57 | 14.18 | 13.37 | 1.49 | 1.61 | 1.55 | 1.17 | 1.27 | 1.22 |
| 159     | 13.70 | 13.61 | 13.65 | 1.94 | 2.12 | 2.03 | 0.83 | 1.05 | 0.94 |
| 160     | 13.18 | 13.60 | 13.39 | 0.87 | 0.85 | 0.86 | 0.89 | 0.92 | 0.91 |
| 161     | 15.18 | 12.70 | 13.94 | 0.71 | 0.36 | 0.54 | 0.97 | 0.62 | 0.79 |
| 162     | 13.44 | 12.58 | 13.01 | 1.02 | 1.03 | 1.03 | 1.10 | 0.44 | 0.77 |
| 163     | 14.32 | 15.70 | 15.01 | 1.09 | 1.40 | 1.25 | 0.90 | 0.17 | 0.53 |
| 164     | 11.87 | 10.98 | 11.43 | 0.85 | 0.91 | 0.88 | 0.95 | 0.22 | 0.59 |
| 165     | 15.75 | 15.07 | 15.41 | 0.76 | 0.79 | 0.78 | 1.35 | 0.05 | 0.70 |
| 166     | 16.58 | 14.18 | 15.38 | 0.96 | 1.13 | 1.04 | 0.97 | 0.31 | 0.64 |
| 167     | 11.09 | 11.09 | 11.09 | 1.09 | 1.41 | 1.25 | 1.20 | 0.59 | 0.90 |
| 168     | .     | 11.88 | .     | 1.01 | 1.03 | 1.02 | 1.11 | 0.14 | 0.62 |
| 169     | 15.01 | 15.16 | 15.09 | 1.11 | 1.31 | 1.21 | 0.84 | 0.13 | 0.48 |
| 170     | 13.83 | 14.07 | 13.95 | 0.96 | 1.10 | 1.03 | 0.91 | 0.15 | 0.53 |
| 171     | 14.05 | 14.08 | 14.06 | 0.99 | 1.17 | 1.08 | 0.83 | 0.38 | 0.60 |
| 172     | 14.50 | 13.81 | 14.16 | 0.95 | 0.96 | 0.95 | 1.20 | 0.76 | 0.98 |
| 173     | 13.21 | 12.57 | 12.89 | 1.02 | 1.38 | 1.20 | 1.21 | 0.80 | 1.00 |
| 174     | 13.77 | 13.09 | 13.43 | 1.19 | 1.03 | 1.11 | 1.22 | 0.70 | 0.96 |
| 175     | 13.07 | 13.30 | 13.18 | 0.94 | 1.08 | 1.01 | 0.74 | 0.92 | 0.83 |
| 176     | 14.19 | 14.00 | 14.10 | 1.04 | 1.03 | 1.03 | 1.09 | 1.11 | 1.10 |
| 177     | 11.25 | 11.74 | 11.49 | 1.26 | 1.39 | 1.33 | 0.76 | 0.33 | 0.55 |
| 178     | 13.00 | 12.20 | 12.60 | 0.98 | 0.89 | 0.94 | 1.01 | 0.34 | 0.67 |
| 179     | 13.35 | 11.61 | 12.48 | 1.22 | 1.29 | 1.26 | 1.25 | 0.62 | 0.93 |
| 180     | 11.22 | 10.85 | 11.03 | 0.95 | 0.95 | 0.95 | 1.29 | 0.58 | 0.93 |
| 181     | 12.32 | 12.60 | 12.46 | 1.11 | 1.46 | 1.29 | 1.13 | 0.79 | 0.96 |
| 182     | 13.03 | 12.18 | 12.61 | 1.20 | 1.08 | 1.14 | 1.02 | 0.63 | 0.82 |
| 183     | 14.89 | 14.30 | 14.60 | 1.34 | 1.38 | 1.36 | 1.12 | 0.68 | 0.90 |
| 184     | 13.43 | 12.52 | 12.97 | 1.41 | 1.50 | 1.45 | 0.37 | 0.49 | 0.43 |
| Parent1 | 15.51 | 15.84 | 15.68 | 1.44 | 1.51 | 1.48 | 1.04 | 1.40 | 1.22 |
| Parent2 | 11.33 | 11.91 | 11.62 | 1.04 | 1.14 | 1.09 | 0.87 | 0.70 | 0.78 |
