# Supplementary material for: QTL mapping of selenium content using a RIL population in wheat
Source: PubMed Central journal article supplement (PMC5589217; doi:10.1371/journal.pone.0184351), 2017-09-07
Supplement: pone.0184351.s002.pdf [file pone.0184351.s002.pdf]

**S2 Table. Basic information of the four markers related with *QSsec-4B* on 4B chromosome**

| Marker name       | Chromosome | postion | Type of the markers         |
|-------------------|------------|---------|-----------------------------|
| wPt-744595        | 4B         | 0       | DArT (Wheat PstI (TaqI) V3) |
| wPt-7233          | 4B         | 1.817   | DArT (Wheat PstI (TaqI) V3) |
| wPt-8555          | 4B         | 3.139   | DArT (Wheat PstI (TaqI) V3) |
| Jagger_c10704_106 | 4B         | 5.169   | SNP 90K                     |
