# Supplementary material for: QTL mapping of selenium content using a RIL population in wheat
Source: PubMed Central journal article supplement (PMC5589217; doi:10.1371/journal.pone.0184351), 2017-09-07
Supplement: pone.0184351.s003.pdf [file pone.0184351.s003.pdf]

**S3 Table. Sequence of the four markers related with *QSsec-4B* on 4B chromosome**

| Marker            | Sequence                                                                                                                                                                                                                                                                                                                                                                                                                                                                                                                                          |
|-------------------|---------------------------------------------------------------------------------------------------------------------------------------------------------------------------------------------------------------------------------------------------------------------------------------------------------------------------------------------------------------------------------------------------------------------------------------------------------------------------------------------------------------------------------------------------|
| wPt-744595        | tgcagagcaaaaacctggacagatcccttgcctctggaagtagctacagggttcagtggtgagctggtactgaacaaaaagtcacatctgtatttctacittatcacacatcaacaattccaagcttaaaattggtgatgcacgtcgcgccatggaaaagaagg<br>ataaattagatttagtcactagagacaatcaacaactccttctaaagggaaatgtggctgcacacaaagtgaggagacaataatttagagagtaagaataaagtaagtagtgggtggtctggggagcagggaatcagttaggtacctagatgagagacatat<br>ctgaatgtccgcgagcatgttggtgatataggtgctaaagcatcaagaaccgctgccctggttctgggtccttcccttgagctggtactgggaacaagcatgcaataaaaattagtcctcgtcattagctacatcacacatcaacaatccatgctaaaactga<br>ttgatgtgaataagattcactcactgca |
| wPt-7233          | tgcagatcaatgttgtcctcatgctgttggttccactgtgtaaaataggtaccatttcttcaatatctcataaagatcatctgcataagcctcaacgtgcaggatatgattgaactgtccactcgggccatatttccaagccatggaagcgagtactttgggca<br>gcagtcagcaacaatgacttgactttacagtttaggtacatcgggagttgtccctcgtcatagtgaactgtcagcacgagtcctggagtgcaattatctcctgca                                                                                                                                                                                                                                                                 |
| wPt-8555          | tgcagtacctctcagaacccaactcctcccttggcccactgtgcacgcgggcagtaaggcatttctcctctcctcctccactggacacctcggttctcaacctcgtctaggaatttctgatgatccaagttggagttcttgagcaccatactctctccc<br>atacttgagtacaccagccacaatatcagcatggcgggtgtggccaaggtccagctgtcagcgacatactgtaaaggacataagctactccaagggtctgcaccacaagagagagcaggtggcgtggccagagctgtgtctccatggcgggtgatggtgctct<br>ggccaccgaggtgcaccagcaggaatggcggccagaatgccaccagctgca                                                                                                                                                     |
| Jagger_c10704_106 | acaacaacagactctagccgaaaaagaacatgcatatgtgggtggcaatg[t/c]tgtgctgcaacaaataaagttgatggtgaatctagttgctcagctgttg                                                                                                                                                                                                                                                                                                                                                                                                                                          |
