# Supplementary material for: QTL mapping of selenium content using a RIL population in wheat
Source: PubMed Central journal article supplement (PMC5589217; doi:10.1371/journal.pone.0184351), 2017-09-07
Supplement: pone.0184351.s004.pdf [file pone.0184351.s004.pdf]

**S4 Table. Significant alignments of the four markers related with *QSsec-4B* on 4B chromosome**

| Marker            | Sequences producing significant alignments |
|-------------------|--------------------------------------------|
| wPt-7233          | TGACv1_scaffold_328822_4BS                 |
| wPt-744595        | TGACv1_scaffold_337086_4BS                 |
| wPt-8555          | TGACv1_scaffold_328580_4BS                 |
| Jagger_c10704_106 | TGACv1_scaffold_332206_4BS                 |

Note: sequence was blast on line: <http://www.sequenceserver.com/>
